# Supplementary material
Source: HighWire-hosted journal article supplement (https://jcptest-stage.highwire.org/content/jcp-2024-209429)
Supplement: inline-supplementary-material-1 [file inline-supplementary-material-1.pdf]

## Supplementary Information

### Supplementary Tables

**Supplementary Table 1.** Overview of cohorts

| Entity                                 | Sample size | Alb-ISH*   | CRP IHC*   |
|----------------------------------------|-------------|------------|------------|
| Intrahepatic cholangiocarcinoma (iCCA) | 153         | 151        | 151        |
| Perihilar cholangiocarcinoma (pCCA)    | 153         | 153        | 148        |
| Distal cholangiocarcinoma (dCCA)       | 126         | 126        | 126        |
| Adenocarcinoma of the gallbladder      | 131         | 112        | 119        |
| Colorectal liver metastasis            | 98          | 88         | 86         |
| Pancreatic adenocarcinoma              | 92          | 87         | 80         |
| Pulmonary adenocarcinoma               | 73          | 72         | 70         |
| Invasive breast carcinoma              | 212         | 206        | 212        |
| <b>Total</b>                           | <b>1038</b> | <b>995</b> | <b>992</b> |
| <b>Total (other than iCCA)</b>         | <b>885</b>  | <b>844</b> | <b>841</b> |

\* Presented are the analysis-dependent numbers of evaluable cases per entity. Differences to original sample size numbers are due to tissue core detachment, rolling and floating.

Abbreviations: Alb-ISH, Albumin in situ hybridization; CRP IHC, C-reactive protein immunohistochemistry.

**Supplementary Table 2.** Metrics using a CRP threshold of IRS=2.

|                           | Sensitivity | Specificity |
|---------------------------|-------------|-------------|
| <b>CRP IHC</b>            | 83.4%       | 86.7%       |
| <b>Alb-ISH &amp; CRP*</b> | 88.0%       | 86.4%       |

\*For combined assessment of Alb-ISH and CRP, positivity of a single marker was considered sufficient for a diagnosis of iCCA (i.e., diagnosis rejection required co-negativity). Abbreviations: Alb-ISH, albumin in situ hybridization; CRP, C-reactive protein; IHC, immunohistochemistry.

## Supplementary Figures

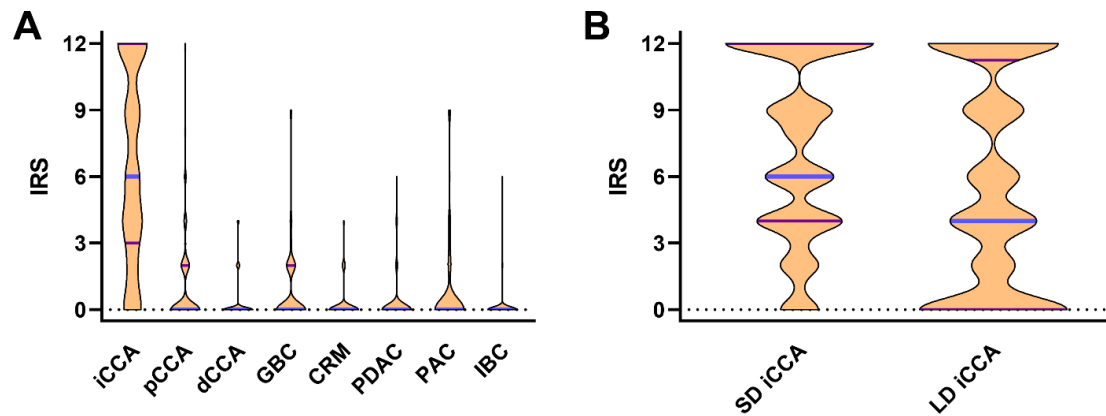

**Supplementary Figure 1. Distribution of CRP expression.** Violin plots of CRP expression for the comparison iCCA vs. other adenocarcinomas (A), and small duct vs. large duct iCCA (B). The median is highlighted in blue, and the interquartile range is highlighted in purple. CRM, colorectal metastasis; dCCA, distal cholangiocarcinoma; GBC, gallbladder cancer; IBC, invasive breast cancer; iCCA, intrahepatic cholangiocarcinoma; IRS, immunoreactive score; LD, large duct; PAC, pulmonary adenocarcinoma; pCCA, perihilar cholangiocarcinoma; PDAC, pancreatic adenocarcinoma; SD, small duct.
